# Supplementary material
Source: Springer Nature journal article supplement (https://www.springermedizin.de/resource/supplementary/12889_2007_1239_MOESM2_ESM.pdf/9502758)

- Traffic
- Fall
- Fire/flame/heat
- Poisoning
- Struck/heat
- Animal attack
- Stab/cut
- Electricity Scock
- Drowning/near drowning

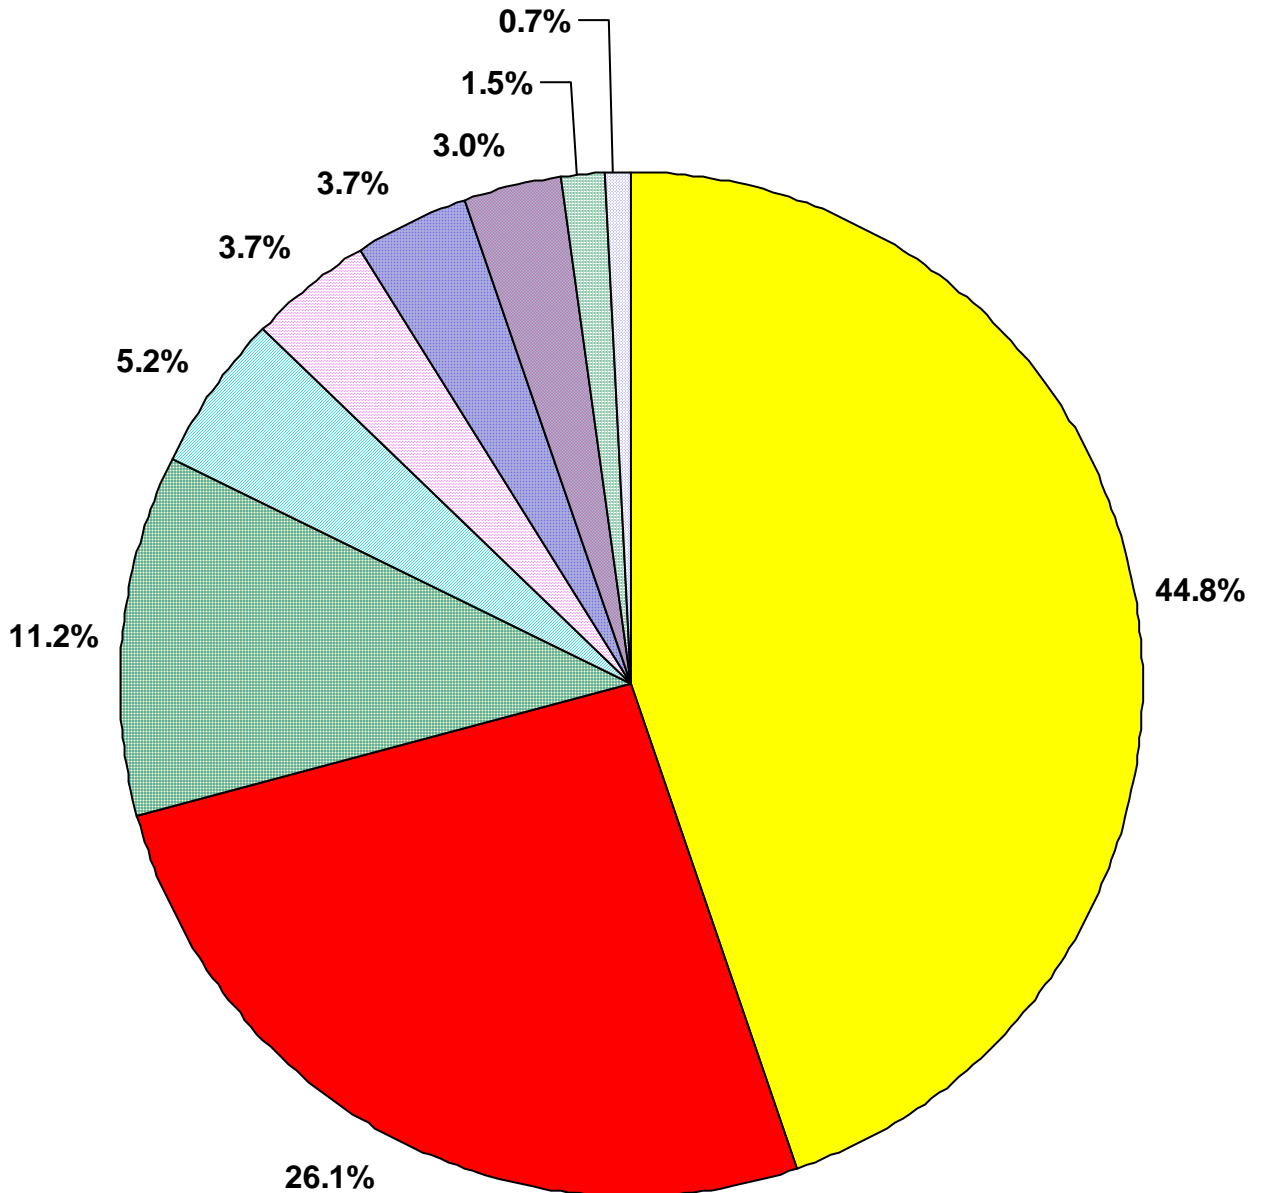

Supplement: MOESM2 [file 9502758]
